# Supplementary material for: Association of Vitamin D Deficiency and Insufficiency with Pathology in Hospitalized Patients
Source: MDPI journal article supplement (doi:10.3390/diagnostics13050998), 2023-03-06
Supplement: s1 [file s1]

Table S1 Correlation between sex, year, month, season and group ages with vitamin D status

|                            |           | Vitamin D status |               |         |      |
|----------------------------|-----------|------------------|---------------|---------|------|
|                            | Factor    | Deficiency       | Insufficiency | Normal  |      |
| Adjusted ratio,<br>p<0,001 | SEX       | Males            | 7.3           | 0.6     | -7.3 |
|                            |           | Females          | -7.3          | -0.6    | 7.3  |
|                            | YEAR      | 2020             | -8.0          | 3.7     | 3.9  |
|                            |           | 2021             | 0.5           | -1, 0.4 | 0.8  |
|                            |           | 2022             | 7.3           | -2.0    | -4.8 |
| Month of the year          | January   | 4.1              | -2.9          | -1.0    |      |
|                            | February  | 5.0              | -4,6          | -0.3    |      |
|                            | March     | 6.1              | -1.5          | -4.2    |      |
|                            | April     | 5.9              | -.6           | -4.9    |      |
|                            | May       | 4.1              | 1.2           | -5.0    |      |
|                            | June      | -1.1             | 2.5           | -1.4    |      |
|                            | July      | -4.8             | 2.1           | 2.4     |      |
|                            | August    | 5.7              | 1.5           | 3.9     |      |
|                            | September | -7.5             | 1. .8         | 5.2     |      |
|                            | October   | -5.6             | 1.9           | 3.4     |      |
|                            | November  | -3.4             | -.7           | 3.8     |      |
|                            | December  | 0.1              | -1.0          | 0.8     |      |
| Season                     | Spring    | 10.6             | -.6           | -9.2    |      |
|                            | Summer    | -6.8             | 4.0           | 2.5     |      |
|                            | Fall      | -10.4            | 1.9           | 7.9     |      |
|                            | Winter    | 6.0              | -5.5          | -0.3    |      |
| Age                        | <20       | 2.7              | -1.0          | -1.5    |      |
|                            | 20-39     | 12.5             | -4.9          | -6.9    |      |
|                            | 40-59     | -1.2             | 4.7           | -3.3    |      |
|                            | 60-79     | -11.7            | 3.4           | 7.5     |      |
|                            | > 80      | 6.3              | -4.6          | -1.5    |      |

Table S2: The correlation with discharge first diagnostic;

|                     |               | Optimal (n=4367;<br>39.05%) |                              | Insufficiency<br>(n=3591; 32.11%) |                             | Deficiency<br>(n=3224; 28.83%)  |              |
|---------------------|---------------|-----------------------------|------------------------------|-----------------------------------|-----------------------------|---------------------------------|--------------|
|                     | N (%)         | p-value                     | OR, 95%CI                    | p-value                           | OR, 95%CI                   | p-value                         | OR,<br>95%CI |
| Infectious diseases | 115<br>(1.0%) | <0.0001                     | OR=0,5,<br>[0,337-<br>0,741] | <0,01                             | OR=0,488, [0,298-<br>0,799] | p<0,01, OR=3,762, [2,584-5,475] |              |
| Malignant neoplasm  | 118<br>(1.1%) | P<0,001                     |                              | P=0.158                           |                             | p<0,01, OR=2,673,[1,859-3845]   |              |

|                                                             |                 |          |                            |                    |                         |                                 |
|-------------------------------------------------------------|-----------------|----------|----------------------------|--------------------|-------------------------|---------------------------------|
| Benign or uncertain behaviour neoplasms                     | 199<br>(1.8%)   | P=0,131  | OR=0,501,<br>[0,34-0,738]  | P=0,615            | OR=1,183,[1,070-1,307]  | P=0,66                          |
| Anaemias                                                    | 80<br>(0.7%)    | P=0,079  |                            | P=0,32             |                         | P=0,142                         |
| Diseases of blood and blood-forming organs                  | 9<br>(0.08%)    | P=0,807  |                            | P=0,76             |                         | P=0,661                         |
| Disorders of thyroid gland                                  | 2258<br>(20.2%) | P<0,001  |                            | P=0,001,           |                         | P<0,001, OR=0,578,[0,517-0,646] |
| Diabetes mellitus                                           | 314<br>(2.8%)   | P=0,76   | OR=1,27,<br>[1,158-1,393]  | P=0,877            | OR=1,205, [1,007-1,441] | P=0,484                         |
| Disorders of other endocrine glands and pancreas            | 83<br>(0.7%)    | P=0,411  |                            | P=0,836            |                         | P=0,476                         |
| Malnutrition and nutritional deficiencies                   | 193<br>(1.7%)   | P=0,0355 |                            | P=0,17             |                         | P=0,62                          |
| Obesity and other hyperalimentation and metabolic disorders | 579<br>(5.2%)   | P=0,004  |                            | P=0,041            |                         | P=0,447                         |
| Mental and behavioural disorders                            | 507<br>(4.5%)   | P=0,146  | OR=0,779,<br>[0,658-0,923] | P=0,816            |                         | P=0,17,OR=1,259, [1,042-1,521]  |
|                                                             |                 |          |                            |                    |                         |                                 |
| Diseases of the nervous system                              | 407<br>(3.6%)   | P=0,142  |                            | P=0,318            |                         | P=0,551                         |
| Diseases of the eye and adnexa                              | 5<br>(0.04%)    | P=0,159  |                            | P=0,666            |                         | P=0,155                         |
| Diseases of the ear and mastoid process                     | 35<br>(0.3%)    | P=0,494  |                            | P=0,693            |                         | P=0,434                         |
| Acute rheumatic fever and chronic rheumatic heart diseases  | 2<br>(0.02%)    | P=0,966  |                            | P=0,369            |                         | P=0,509                         |
| Hypertensive diseases                                       | 17<br>(0.2%)    | P=0,545  |                            | P=0,55             |                         | P,=0,629                        |
| Ischaemic heart diseases                                    | 135<br>(1.2%)   | P=0,794  |                            | P=0,235            |                         | P=0,576                         |
| Other forms of heart disease and pulmonary heart diseases   | 816<br>(7.3%)   | P<0,001, |                            | P=0,027<br>OR=0,83 |                         | P<0,001, OR=1,714,[1,481-1,985] |

|                                                                    |                 |         |                                 |                    |                            |                                      |
|--------------------------------------------------------------------|-----------------|---------|---------------------------------|--------------------|----------------------------|--------------------------------------|
|                                                                    |                 |         | OR=0,75,<br>[0,649-<br>0,868]   | 2,[0,707-<br>0,98] |                            |                                      |
| Diseases of the<br>respiratory system                              | 1552<br>(13.9%) | P=0,009 |                                 | P=0,719            |                            | P<0,001, OR=1,26, [1,124-<br>1,413]  |
| Diseases of oral cavity,<br>salivary glands and jaws               | 4<br>(0.04%)    | P=0,289 | OR=0,866,<br>[0,776-<br>0,964]  | P=0,869            |                            | P=0,23                               |
| Diseases of oesophagus,<br>stomach and duodenum                    | 657<br>(5.9%)   | P=0,205 |                                 | P=0,914            |                            | P=0,447                              |
| Hernia and diseases of<br>the appendix                             | 21<br>(0.2%)    | P=0,723 |                                 | P=0,987            |                            | P=0,661                              |
| Noninfective enteritis<br>and colitis                              | 29<br>(0.3%)    | P=0,253 |                                 | P=0,493            |                            | P=0,501                              |
| Other diseases of<br>intestines and diseases of<br>peritoneum      | 68<br>(0.6%)    | P=0,464 |                                 | P=0,508            |                            | P=0,216                              |
| Liver, biliary and<br>pancreatic diseases                          | 922<br>(8.2%)   | P=0,025 | OR=1,167,<br>[1,02-<br>1,336]   | P=0,13             |                            | P=0,294                              |
| Other digestive diseases                                           | 6<br>(0.05%)    | P=0,118 |                                 | P=0,514            |                            | P=0,41,                              |
| Diseases of the skin and<br>subcutaneous tissue                    | 33<br>(0.3%)    | P=0,483 |                                 | P=0,842            |                            | P=0,18                               |
| Diseases of the<br>musculoskeletal system<br>and connective tissue | 1419<br>(12.7%) | P<0,001 | OR=1,281,<br>[1,146-<br>1,432]  | P=0,627            |                            | P<0,001, OR=0,71,[0,623-0,89]        |
| Urinary and renal<br>diseases                                      | 217<br>(1.9%)   | P=0,001 | OR=0,626,<br>[0,475=-<br>0,827] | P=0,117            |                            | P<0,001, OR=2,358, [1,801-<br>3,088] |
| Unspecific                                                         | 382<br>(3.4%)   | P=0,781 |                                 | P=0,665            |                            | P=0,634                              |
| Cardiovascular disorders                                           | 4690            | P<0,001 | OR=0,742,<br>[0,688-<br>0,800]  | P<0,001            | OR=0,848,[0,78-<br>0,921]  | P<0,001,OR=1,785, [1,644-<br>1,939]  |
| Metabolic disorders                                                | 4296            | P<0,001 | OR=0,788,<br>[0,73-0,85]        | P=0,536            |                            | P<0,001, OR=1,409, [1,296-<br>1,531] |
| Endocrine total                                                    | 3736            | P=0,643 |                                 | P=0,674            |                            | P=0,785                              |
| Cancers total                                                      | 343             | P=0,001 | OR=0,713,<br>[0,584-<br>0,869]  | P=0,007            | OR=0,727,[0,577-<br>0,916] | P<0,001, OR=2,104, [1,728-<br>2,562] |

|          |      |         |                                |         |  |                                  |
|----------|------|---------|--------------------------------|---------|--|----------------------------------|
| COVID-19 | 1913 | P<0,001 | OR=0,835,<br>[0,757-<br>0,922] | P=0,189 |  | P<0,001, OR=1,381, [1,244-1,534] |
|          |      |         |                                |         |  |                                  |

Table S3: Correlation between comorbidities and vitamin D status.

| Adjusted ratio                  | Vitamin D status |            |               |         | Pearson Chi-Square | P value |
|---------------------------------|------------------|------------|---------------|---------|--------------------|---------|
|                                 | Factor           | Deficiency | Insufficiency | Optimal |                    |         |
| <b>Cardiovascular pathology</b> | positive         | 13,8       | -4,0          | -9,0    | 196,395            | 0.000   |
| <b>Dysmetabolic status</b>      | positive         | 8,1        | 0,3           | -7,8    | 83,281a            | 0.000   |
| <b>Endocrine disorders</b>      | positive         | -0,3       | 0,1           | ,2      | 0,080a             | 0,961   |
| <b>Maglinancy</b>               | positive         | 6,9        | -3,8          | -2,8    | 48,497a            | 0.000   |
| <b>COVID-19</b>                 | positive         | 6,1        | -1,3          | -4,4    | 39,056a            | 0.000   |
